# Supplementary material for: Validity of the Cancer and Aging Research Group Predictive Tool in Older Japanese Patients
Source: MDPI journal article supplement (doi:10.3390/cancers14092075), 2022-04-21
Supplement: s1 [file s1]

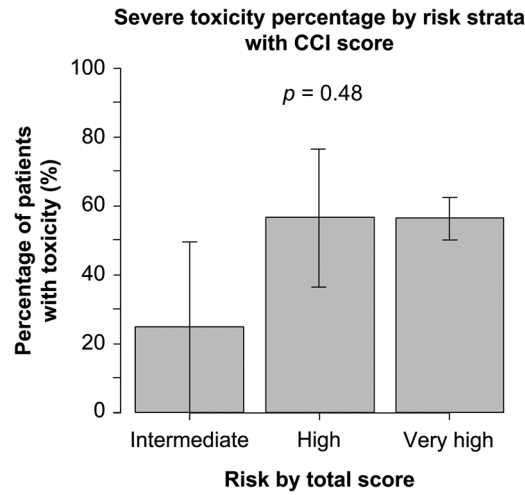

**Figure S1.** Ability of CCI to predict grade 3–5 CRAEs. Abbreviations: CCI, Charlson comorbidity index; CRAEs, chemotherapy-related adverse events.

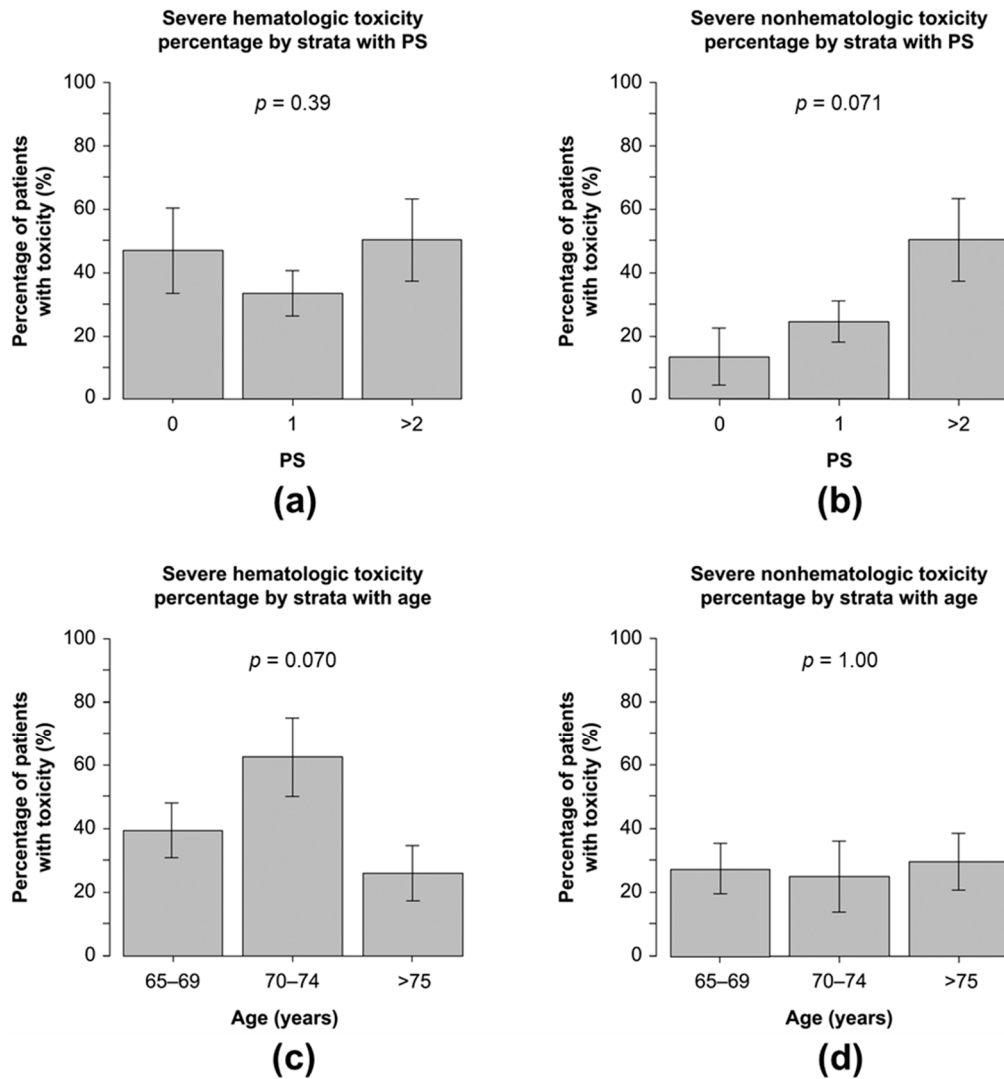

**Figure S2.** The percentage of participants with severe hematologic (a) and nonhematologic (b) toxicity based on ECOG PS scores or severe hematologic (c) and nonhematologic (d) toxicity based on age. Abbreviations: ECOG PS, Eastern Cooperative Oncology Group performance status.

**Table S1.** Prediction model and scoring algorithm for chemotherapy toxicity.

| Variable                                                                                                                                                                      | Value/Response                                                 | Score |
|-------------------------------------------------------------------------------------------------------------------------------------------------------------------------------|----------------------------------------------------------------|-------|
| Age (years)                                                                                                                                                                   | ≥72                                                            | 2     |
|                                                                                                                                                                               | <72                                                            | 0     |
| Cancer type                                                                                                                                                                   | GI or GU cancer                                                | 2     |
|                                                                                                                                                                               | Other cancer types                                             | 0     |
| Planned chemotherapy dose                                                                                                                                                     | Standard dose                                                  | 2     |
|                                                                                                                                                                               | Dose reduced upfront                                           | 0     |
| Planned No. of chemotherapy drugs                                                                                                                                             | Polychemotherapy                                               | 2     |
|                                                                                                                                                                               | Monochemotherapy                                               | 0     |
| Hemoglobin                                                                                                                                                                    | <11 g/dL (male),                                               | 3     |
|                                                                                                                                                                               | <10 g/dL (female)                                              |       |
|                                                                                                                                                                               | ≥11 g/dL (male),                                               | 0     |
|                                                                                                                                                                               | ≥10 g/dL (female)                                              |       |
| Creatinine clearance                                                                                                                                                          | <34 mL/min                                                     | 3     |
|                                                                                                                                                                               | ≥34 mL/min                                                     | 0     |
| How is your hearing (with a hearing aid, if needed)?                                                                                                                          | Fair, poor, or totally deaf                                    | 2     |
|                                                                                                                                                                               | Excellent or good                                              | 0     |
| No. of falls in the past 6 months                                                                                                                                             | ≥1                                                             | 3     |
|                                                                                                                                                                               | None                                                           | 0     |
| Can you take your own medicine?                                                                                                                                               | With some help/unable without help                             | 1     |
|                                                                                                                                                                               |                                                                | 0     |
| Does your health limit you in walking 100 m?                                                                                                                                  | Somewhat limited/limited a lot                                 | 2     |
|                                                                                                                                                                               |                                                                | 0     |
| During the past 4 weeks, how much of the time has your physical health or emotional problems interfered with your social activities (visiting with friends, relatives, etc.)? | Limited some of the time, most of the time, or all of the time | 1     |
|                                                                                                                                                                               | Limited none of the time or a little of the time               | 0     |

GI, gastrointestinal; GU, genitourinary.

**Table S2.** Chemotherapy-related adverse events.

|                     | Grade 3–5 |    | Grade 3 |    | Grade 4 |    |
|---------------------|-----------|----|---------|----|---------|----|
|                     | No.       | %  | No.     | %  | No.     | %  |
| Hematologic         |           |    |         |    |         |    |
| Leukopenia          | 14        | 18 | 12      | 16 | 2       | 3  |
| Neutropenia         | 21        | 28 | 12      | 16 | 9       | 12 |
| Anemia              | 11        | 14 | 9       | 12 | 2       | 3  |
| Thrombocytopenia    | 2         | 3  | 1       | 1  | 1       | 1  |
| Febrile neutropenia | 3         | 4  | 3       | 4  | 0       | 0  |
| Nonhematologic      |           |    |         |    |         |    |
| Fatigue             | 12        | 16 | 12      | 16 | 0       | 0  |
| Nausea              | 12        | 16 | 12      | 16 | 0       | 0  |
| Mucositis oral      | 3         | 4  | 3       | 4  | 0       | 0  |
| Diarrhea            | 1         | 1  | 1       | 1  | 0       | 0  |
| Hypertension        | 1         | 1  | 1       | 1  | 0       | 0  |
| Proteinuria         | 1         | 1  | 1       | 1  | 0       | 0  |
| Edema               | 1         | 1  | 1       | 1  | 0       | 0  |
| Hyponatremia        | 2         | 3  | 1       | 1  | 1       | 1  |
| Hyperkalemia        | 2         | 3  | 2       | 3  | 0       | 0  |
| Hypomagnesemia      | 1         | 1  | 0       | 0  | 1       | 1  |
